# Supplementary material
Source: publisher site journal article supplement (https://www.dovepress.com/get_supplementary_file.php?f=216027.docx)
Supplement: Supplementary file 1 [file get_supplementary_file.php]

**Supplementary table 1** Student questionnaire: English

| **Age:** | **Gender:** | | Male | | | | Female | | | | | Other | |
| --- | --- | --- | --- | --- | --- | --- | --- | --- | --- | --- | --- | --- | --- |
| **How many hours of individual/small group clinical instruction per week did you receive during your surgical rotation?** | | | | | | | | | | | | | |
| 0 - 1 | 1 - 2 | 2 - 3 | | | | 3 – 4 | | | > 4 | | | | |
| **How many hours of individual/small group clinical instruction per week do you think you ought to receive during your surgical rotation?** | | | | | | | | | | | | | |
| 0 - 1 | 1 - 2 | 2 - 3 | | | | 3 – 4 | | | > 4 | | | | |
| **How many hours do you think you are expected to spend studying when not on duty per week?** | | | | | | | | | | | | | |
| 0 - 5 | 6 - 10 | 11 - 20 | | | | 21 – 30 | | | > 30 | | | | |
| **How many times per week did you practice procedural skills (suturing, etc.) at your university surgical skills training centre?** | | | | | | | | | | | | | |
| 0 | 1 - 2 | 2 - 4 | | | | 4 - 6 | | | > 6 | | | | |
| **Do you think you had adequate opportunity to practice procedural skills on patients (in theatre, clinic, trauma, etc.)?** | | | | | | Yes | | | | | No | | |
| **What area of training do you think medical students learn the most from?** | | | | | | | | | | | | | |
| One-on-one | Small-group tutorials | Lectures | | | | In theatre | | | In outpatient clinic | | | | |
| **I believe the following skills are absolutely necessary for a medical student to have learned by the end of his/her surgical rotation.** | | | | | | | | | | | | | |
|  | | | | Strongly disagree | Disagree | | | Neither agree nor disagree | | Agree | | | Strongly agree |
| Basic surgical anatomy | | | |  |  | | |  | |  | | |  |
| Proper surgical history | | | |  |  | | |  | |  | | |  |
| Identify surgical problems | | | |  |  | | |  | |  | | |  |
| Ability to present patients | | | |  |  | | |  | |  | | |  |
| Identify surgical complications | | | |  |  | | |  | |  | | |  |
| Work within a hierarchy | | | |  |  | | |  | |  | | |  |
| Sterile technique | | | |  |  | | |  | |  | | |  |
| Ability to suture | | | |  |  | | |  | |  | | |  |
| Assist in theatre | | | |  |  | | |  | |  | | |  |
| **If you have theoretical or clinical questions about the care of patients, who should you consult first?** | | | | | | | | | | | | | |
| Consultant | Registrar | Intern | | | | Fellow student | | | Nurse | | | | |
| **Faculty view medical students as an inconvenience to day-to-day responsibilities.** | | | | | | True | | | | | False | | |
| **Faculty would rather** not **have a medical student on the medical team** | | | | | | True | | | | | False | | |
| **I found faculty to be respectful to patients.** | | | | | | True | | | | | False | | |
| **I found faculty to be respectful to medical students.** | | | | | | True | | | | | False | | |

|  | Strongly disagree | Disagree | Neither agree nor disagree | Agree | Strongly agree |
| --- | --- | --- | --- | --- | --- |
| **I believe the current surgical curriculum is adequate.** |  |  |  |  |  |
| **I am planning to pursue a career in general surgery or a surgical subspecialty.** |  |  |  |  |  |
| **I believe medical students play an important role in the clinical team.** |  |  |  |  |  |
| **In general, I believe consultants do well in teaching medical students.** |  |  |  |  |  |
| **In general, I believe registrars do well in teaching medical students.** |  |  |  |  |  |
| **Surgical faculty play an important role in shaping the career of a medical student?** |  |  |  |  |  |

| **During my surgical rotation, I had a mentor.** | | | | | | | | | | | | True | | | False | | |
| --- | --- | --- | --- | --- | --- | --- | --- | --- | --- | --- | --- | --- | --- | --- | --- | --- | --- |
| **I communicated with my mentor every:** | | | | | | | | | | | | | | | | | |
| Day | Week | | Month | Quarter | | | Semester | | Year | | | | Never | | | | NA |
| **I identified a role model during my surgical rotation.** | | | | | | | | | | | | True | | | False | | |
| **In my surgical rotation, I found the best role models to be:** | | | | | | | | | | | | | | | | | |
| Consultants | | Registrar | | | | Intern | | | | | Fellow student | | | | | Nurse | |
| **In my surgical rotation, I found the worst role models to be:** | | | | | | | | | | | | | | | | | |
| Consultant | | Registrar | | | | Intern | | | | | Fellow student | | | | | Nurse | |
| **In my opinion, the most important characteristics in a mentor/role model are:** | | | | | | | | | | | | | | | | | |
|  | | | | | Strongly disagree | | | Disagree | | Neither agree nor disagree | | | | Agree | Strongly agree | | |
| Physician qualities:  Attitude/enthusiasm  Clinical competence  Empathy  Fund of knowledge | | | | |  | | |  | |  | | | |  |  | | |
| Supervisor qualities:  Student encouragement  Provides feedback  Supervised adequately  Set fair expectations | | | | |  | | |  | |  | | | |  |  | | |
| Teacher qualities:  Teaching skills  Commitment to teaching  Availability  Inspirational ability | | | | |  | | |  | |  | | | |  |  | | |
| Personal qualities:  Supportive/caring  Considerate  Friendly  Fun to work with | | | | |  | | |  | |  | | | |  |  | | |

**Supplementary table 2** Student questionnaire: Swedish

| **Ålder:** | **Kön:** | | | Man | | | | | Kvinna | | | | | | | Annan | | |
| --- | --- | --- | --- | --- | --- | --- | --- | --- | --- | --- | --- | --- | --- | --- | --- | --- | --- | --- |
| **Hur många timmar av individuell eller smågruppsundervisning per vecka hade du under din kirurgiska placering?** | | | | | | | | | | | | | | | | | | |
| 0 - 1 | 1 - 2 | 2 - 3 | | | | | | 3 – 4 | | | | > 4 | | | | | | |
| **Hur många timmar av individuell eller smågruppsundervisning per vecka tycker du att du borde fått under din kirurgiska placering?** | | | | | | | | | | | | | | | | | | |
| 0 - 1 | 1 - 2 | 2 - 3 | | | | | | 3 – 4 | | | | > 4 | | | | | | |
| **Hur många timmar per vecka tror du det förväntas av dig att studera när du ej jobbar?** | | | | | | | | | | | | | | | | | | |
| 0 - 5 | 6 - 10 | 11 - 20 | | | | | | 21 – 30 | | | | > 30 | | | | | | |
| **Hur många gånger per vecka tränade du på praktiska färdigheter (suturering, etc) på universitetets kliniska/kirurgiska träningscentrum?** | | | | | | | | | | | | | | | | | | |
| 0 | 1 - 2 | 2 - 4 | | | | | | 4 - 6 | | | | > 6 | | | | | | |
| **Tycker du att du hade adekvata möjligheter att träna på praktiska färdigheter på patienter (på operation, kliniken, trauma, etc)?** | | | | | | | | Ja | | | | | | | Nej | | | |
| **Av vilken utbildningsform anser du att läkarstudenter lär sig mest?** | | | | | | | | | | | | | | | | | | |
| En-och-en | Smågruppsseminarier | Föreläsningar | | | | | | På operation | | | | På öppenvårdsmottagning | | | | | | |
| **Jag tror att följande färdigheter är absolut nödvändiga för en läkarstudent att ha lärt sig under dennes kirurgiska placering.** | | | | | | | | | | | | | | | | | | |
|  | | | | | Håller verkligen inte med | | Håller inte med | | | | Varken håller med eller inte | | | Håller med | | | Håller helt med | |
| Grundläggande kirurgisk anatomi | | | | |  | |  | | | |  | | |  | | |  | |
| Kirurgiskt anamnestagande | | | | |  | |  | | | |  | | |  | | |  | |
| Identifiera kirurgiska problem | | | | |  | |  | | | |  | | |  | | |  | |
| Att kunna presentera patienter | | | | |  | |  | | | |  | | |  | | |  | |
| Identifiera kirurgiska komplikationer | | | | |  | |  | | | |  | | |  | | |  | |
| Arbeta inom en hierarki | | | | |  | |  | | | |  | | |  | | |  | |
| Sterilitet | | | | |  | |  | | | |  | | |  | | |  | |
| Att kunna suturera | | | | |  | |  | | | |  | | |  | | |  | |
| Att kunna assistera på operation | | | | |  | |  | | | |  | | |  | | |  | |
| **Om du har teoretiska eller kliniska frågor om patientvård, vem konsulterar du i första hand?** | | | | | | | | | | | | | | | | | | |
| Överläkare | ST-läkare | AT-läkare | | | | | | Annan student | | | | Sjuksköterska | | | | | | |
| **Personalen ser läkarstudenter som ett besvär i den kliniska vardagen.** | | | | | | | | Sant | | | | | | | Falskt | | | |
| **Personalen skulle hellre** inte **ha läkarstudenter i det medicinska teamet.** | | | | | | | | Sant | | | | | | | Falskt | | | |
| **Jag tycker personalen visar patienter respekt.** | | | | | | | | Sant | | | | | | | Falskt | | | |
| **Jag tycker personalen visar läkarstudenter respekt.** | | | | | | | | Sant | | | | | | | Falskt | | | |
|  | | | Håller verkligen inte med | | | Håller inte med | | | | Varken håller med eller inte | | | Håller med | | | | | Håller helt med |
| **Jag tycker de kirurgiska lärandemålen är adekvata.** | | |  | | |  | | | |  | | |  | | | | |  |
| **Jag planerar att göra karriär i allmänkirurgi eller en kirurgisk subspecialitet.** | | |  | | |  | | | |  | | |  | | | | |  |
| **Jag tycker läkarstudenter är en viktig del av kliniska teamet.** | | |  | | |  | | | |  | | |  | | | | |  |
| **Generellt sett tycker jag överläkare är bra på att utbilda läkarstudenter.** | | |  | | |  | | | |  | | |  | | | | |  |
| **Generellt sett tycker jag ST-läkare är bra på att utbilda läkarstudenter.** | | |  | | |  | | | |  | | |  | | | | |  |
| **Kirurgisk personal spelar en viktig roll i att påverka en läkarstudents karriär.** | | |  | | |  | | | |  | | |  | | | | |  |

| **Jag hade en mentor under min kirurgiska placering.** | | | | | | | | | | | | Sant | | | Falskt | | |
| --- | --- | --- | --- | --- | --- | --- | --- | --- | --- | --- | --- | --- | --- | --- | --- | --- | --- |
| **Jag pratade med min mentor varje:** | | | | | | | | | | | | | | | | | |
| Dag | Vecka | | Månad | Kvartal | | | Termin | | År | | | | Aldrig | | | | N/A |
| **Jag hittade en förebild under min kirurgiska placering.** | | | | | | | | | | | | Sant | | | Falskt | | |
| **Under min kirurgiska placering var de bästa förebilderna:** | | | | | | | | | | | | | | | | | |
| Överläkare | | ST-läkare | | | | AT-läkare | | | | | Annan läkarstudent | | | | | Sjuksköterska | |
| **Under min kirurgiska placering var de sämsta förebilderna:** | | | | | | | | | | | | | | | | | |
| Överläkare | | ST-läkare | | | | AT-läkare | | | | | Annan läkarstudent | | | | | Sjuksköterska | |
| **Enligt min åsikt är de viktigaste karakteristika för en klinisk lärare och mentor/förebild:** | | | | | | | | | | | | | | | | | |
|  | | | | | Håller verkligen inte med | | | Håller inte med | | Varken håller med eller inte | | | | Håller med | Håller helt med | | |
| Läkaregenskaper:  Attityd/entusiasm  Klinisk skicklighet  Empati  Kunskap | | | | |  | | |  | |  | | | |  |  | | |
| Handledaregenskaper:  Studentuppmuntrande  Ger feedback  Adekvat handledning  Rättvisa förväntningar | | | | |  | | |  | |  | | | |  |  | | |
| Utbildningsegenskaper:  Utlärandeskicklighet  Vilja att lära ut  Tillgänglighet  Inspirerande förmåga | | | | |  | | |  | |  | | | |  |  | | |
| Personliga egenskaper:  Stöttande, omsorgsfull, omtänksam  Vänlig, rolig att arbeta med | | | | |  | | |  | |  | | | |  |  | | |

**Supplementary table 3** Faculty questionnaire: English

| **Age:** | **Gender:** | | Male | | | | Female | | | | | | Other | |
| --- | --- | --- | --- | --- | --- | --- | --- | --- | --- | --- | --- | --- | --- | --- |
| **Level of training:** | Consultant | | | | | | | Fellow | | | | | | |
| **Years in surgical practice:** | | | | | | | | | | | | | | |
| 0 – 2 | 3 - 5 | 6 - 8 | | | | 9 – 11 | | | | > 12 | | | | |
| **How many hours of individual/small group clinical instruction per week do you give medical students during their surgical rotation?** | | | | | | | | | | | | | | |
| 0 - 1 | 1 - 2 | 2 - 3 | | | | 3 – 4 | | | | > 4 | | | | |
| **How many hours of individual/small group clinical instruction per week do you think medical students ought to receive during their surgical rotation?** | | | | | | | | | | | | | | |
| 0 - 1 | 1 - 2 | 2 - 3 | | | | 3 – 4 | | | | > 4 | | | | |
| **How many hours do you think medical students are expected to spend studying when not on duty per week?** | | | | | | | | | | | | | | |
| 0 - 5 | 6 - 10 | 11 - 20 | | | | 21 – 30 | | | | > 30 | | | | |
| **How many times per week did you think medical students get to practice procedural skills (suturing, etc.)?** | | | | | | | | | | | | | | |
| 0 | 1 - 2 | 2 - 4 | | | | 4 - 6 | | | | > 6 | | | | |
| **Do you think medical students have adequate opportunity to practice procedural skills on patients (in theatre, clinic, trauma, etc.)?** | | | | | | Yes | | | | | | No | | |
| **What area of training do you think medical students learn the most from?** | | | | | | | | | | | | | | |
| One-on-one | Small-group tutorials | Lectures | | | | In theatre | | | | In outpatient clinic | | | | |
| **I believe the following skills are absolutely necessary for a medical student to have learned by the end of his/her surgical rotation.** | | | | | | | | | | | | | | |
|  | | | | Strongly disagree | Disagree | | | | Neither agree nor disagree | | Agree | | | Strongly agree |
| Basic surgical anatomy | | | |  |  | | | |  | |  | | |  |
| Proper surgical history | | | |  |  | | | |  | |  | | |  |
| Identify surgical problems | | | |  |  | | | |  | |  | | |  |
| Ability to present patients | | | |  |  | | | |  | |  | | |  |
| Identify surgical complications | | | |  |  | | | |  | |  | | |  |
| Work within a hierarchy | | | |  |  | | | |  | |  | | |  |
| Sterile technique | | | |  |  | | | |  | |  | | |  |
| Ability to suture | | | |  |  | | | |  | |  | | |  |
| Assist in theatre | | | |  |  | | | |  | |  | | |  |
| **If medical students have theoretical or clinical questions about the care of patients, who should they consult first?** | | | | | | | | | | | | | | |
| Consultant | Registrar | Intern | | | | Fellow student | | | | Nurse | | | | |
| **I find teaching medical students an inconvenience to my day-to-day responsibilities.** | | | | | | True | | | | | | False | | |
| **If I had a choice, I would rather** *not* **have a medical student on my medical team.** | | | | | | True | | | | | | False | | |

|  | Strongly disagree | Disagree | Neither agree nor disagree | Agree | Strongly agree |
| --- | --- | --- | --- | --- | --- |
| **I believe the current undergraduate surgical curriculum is adequate.** |  |  |  |  |  |
| **I believe medical students play an important role in the clinical team.** |  |  |  |  |  |
| **In general, I believe consultants and fellows do well in teaching medical students.** |  |  |  |  |  |
| **I am very consistent with the methods that I use to evaluate students.** |  |  |  |  |  |
| **I always give feedback to students throughout their surgical rotation, even if unsolicited.** |  |  |  |  |  |
| **I play an important role in shaping the career of a medical student.** |  |  |  |  |  |

| **I believe a medical student should have a mentor during their surgical rotation.** | | | | | | | | | | | | True | | | False | | |
| --- | --- | --- | --- | --- | --- | --- | --- | --- | --- | --- | --- | --- | --- | --- | --- | --- | --- |
| **Medical students should communicate with their mentor every:** | | | | | | | | | | | | | | | | | |
| Day | Week | | Month | Quarter | | | Semester | | Year | | | | Never | | | | NA |
| **I believe a medical student should identify a role model during their surgical rotation.** | | | | | | | | | | | | True | | | False | | |
| **I believe the best role models for medical students are:** | | | | | | | | | | | | | | | | | |
| Consultants | | Registrar | | | | Intern | | | | | Fellow student | | | | | Nurse | |
| **I believe the worst role models for medical students are:** | | | | | | | | | | | | | | | | | |
| Consultant | | Registrar | | | | Intern | | | | | Fellow student | | | | | Nurse | |
| **In my opinion, the most important characteristics in a mentor/role model are:** | | | | | | | | | | | | | | | | | |
|  | | | | | Strongly disagree | | | Disagree | | Neither agree nor disagree | | | | Agree | Strongly agree | | |
| Physician qualities:  Attitude/enthusiasm  Clinical competence  Empathy  Fund of knowledge | | | | |  | | |  | |  | | | |  |  | | |
| Supervisor qualities:  Student encouragement  Provides feedback  Supervised adequately  Set fair expectations | | | | |  | | |  | |  | | | |  |  | | |
| Teacher qualities:  Teaching skills  Commitment to teaching  Availability  Inspirational ability | | | | |  | | |  | |  | | | |  |  | | |
| Personal qualities:  Supportive/caring  Considerate  Friendly  Fun to work with | | | | |  | | |  | |  | | | |  |  | | |

**Supplementary table 4** Faculty questionnaire: Swedish

| **Ålder:** | **Kön:** | | Man | | | | Kvinna | | | | | | Annan | |
| --- | --- | --- | --- | --- | --- | --- | --- | --- | --- | --- | --- | --- | --- | --- |
| **Specialiseringsnivå:** | Överläkare | | | | | | | Specialist | | | | | | |
| **År av kirurgisk tjänstgöring:** | | | | | | | | | | | | | | |
| 0 – 2 | 3 - 5 | 6 - 8 | | | | 9 – 11 | | | | > 12 | | | | |
| **Hur många timmar av individuell/gruppbaserad utbildning ger du per vecka till läkarstudenter under deras kirurgiska placering?** | | | | | | | | | | | | | | |
| 0 - 1 | 1 - 2 | 2 - 3 | | | | 3 – 4 | | | | > 4 | | | | |
| **Hur många timmar av individuell/gruppbaserad utbildning tycker du läkarstudenter borde erhålla under deras kirurgiska placering?** | | | | | | | | | | | | | | |
| 0 - 1 | 1 - 2 | 2 - 3 | | | | 3 – 4 | | | | > 4 | | | | |
| **Hur många timmar per vecka tror du läkarstudenter förväntas studera när de ej har klinisk placering placering?** | | | | | | | | | | | | | | |
| 0 - 5 | 6 - 10 | 11 - 20 | | | | 21 – 30 | | | | > 30 | | | | |
| **Hur många gånger per vecka tror du läkarstudenter får träna på praktiska kliniska färdigheter (suturering, etc)?** | | | | | | | | | | | | | | |
| 0 | 1 - 2 | 2 - 4 | | | | 4 - 6 | | | | > 6 | | | | |
| **Tycker du läkarstudenter har tillräckligt med möjligheter att träna på praktiska kliniska färdigheter på patienter (på operation, kliniken, trauma, etc)?** | | | | | | Ja | | | | | | Nej | | |
| **Av vilken utbildningsform anser du att läkarstudenter lär sig mest?** | | | | | | | | | | | | | | |
| En-och-en | Smågruppsseminarier | Föreläsningar | | | | På operation | | | | På öppenvårdsmottagning | | | | |
| **Jag tror att följande färdigheter är absolut nödvändiga för en läkarstudent att ha lärt sig under dennes kirurgiska placering.** | | | | | | | | | | | | | | |
|  | | | | Håller verkligen inte med | Håller inte med | | | | Varken håller med eller inte | | Håller med | | | Håller helt med |
| Grundläggande kirurgisk anatomi | | | |  |  | | | |  | |  | | |  |
| Kirurgiskt anamnestagande | | | |  |  | | | |  | |  | | |  |
| Identifiera kirurgiska problem | | | |  |  | | | |  | |  | | |  |
| Att kunna presentera patienter | | | |  |  | | | |  | |  | | |  |
| Identifiera kirurgiska komplikationer | | | |  |  | | | |  | |  | | |  |
| Arbeta inom en hierarki | | | |  |  | | | |  | |  | | |  |
| Sterilitet | | | |  |  | | | |  | |  | | |  |
| Att kunna suturera | | | |  |  | | | |  | |  | | |  |
| Att kunna assistera på operation | | | |  |  | | | |  | |  | | |  |
| **Om läkarstudenter har teoretiska eller kliniska frågor om patientvård, vem borde de konsultera i första hand?** | | | | | | | | | | | | | | |
| Överläkare | ST-läkare | AT-läkare | | | | Annan student | | | | Sjuksköterska | | | | |
| **Jag tycker läkarstudenter är ett besvär i den kliniska vardagen.** | | | | | | Sant | | | | | | Falskt | | |
| **Om jag fick välja, skulle jag hellre** inte **ha läkarstudenter i mitt medicinska team.** | | | | | | Sant | | | | | | Falskt | | |

|  | Håller verkligen inte med | Håller inte med | Varken håller med eller inte | Håller med | Håller helt med |
| --- | --- | --- | --- | --- | --- |
| **Jag tycker de kirurgiska lärandemålen är adekvata.** |  |  |  |  |  |
| **Jag tycker läkarstudenter är en viktig del av kliniska teamet.** |  |  |  |  |  |
| **Generellt sett tycker jag överläkare och ST-läkare är bra på att utbilda läkarstudenter.** |  |  |  |  |  |
| **Jag är mycket konsistent med metoderna jag använder för att utvärdera studenter.** |  |  |  |  |  |
| **Jag ger alltid feedback till studenter under deras kirurgiska placering, även om inte bedd om det.** |  |  |  |  |  |
| **Jag spelar en viktig roll i att påverka en läkarstudents karriär.** |  |  |  |  |  |

| **Jag anser att läkarstudenter ska ha en mentor under deras kirurgiska placering.** | | | | | | | | | | | | Sant | | | Falskt | | |
| --- | --- | --- | --- | --- | --- | --- | --- | --- | --- | --- | --- | --- | --- | --- | --- | --- | --- |
| **Läkarstudenter bör prata med sin mentor varje:** | | | | | | | | | | | | | | | | | |
| Dag | Vecka | | Månad | Kvartal | | | Termin | | År | | | | Aldrig | | | | N/A |
| **Jag anser att läkarstudenter bör hitta en förebild under deras kirurgiska placering.** | | | | | | | | | | | | Sant | | | Falskt | | |
| **Jag tycker den bästa förebilden för läkarstudenter är:** | | | | | | | | | | | | | | | | | |
| Överläkare | | ST-läkare | | | | AT-läkare | | | | | Annan läkarstudent | | | | | Sjuksköterska | |
| **Jag tycker den värsta förebilden för läkarstudenter är:** | | | | | | | | | | | | | | | | | |
| Överläkare | | ST-läkare | | | | AT-läkare | | | | | Annan läkarstudent | | | | | Sjuksköterska | |
| **Enligt min åsikt är de viktigaste karakteristika för en klinisk lärare och mentor/förebild:** | | | | | | | | | | | | | | | | | |
|  | | | | | Håller verkligen inte med | | | Håller inte med | | Varken håller med eller inte | | | | Håller med | Håller helt med | | |
| Läkaregenskaper:  Attityd/entusiasm  Klinisk skicklighet  Empati  Kunskap | | | | |  | | |  | |  | | | |  |  | | |
| Handledaregenskaper:  Studentuppmuntrande  Ger feedback  Adekvat handledning  Rättvisa förväntningar | | | | |  | | |  | |  | | | |  |  | | |
| Utbildningsegenskaper:  Utlärandeskicklighet  Vilja att lära ut  Tillgänglighet  Inspirerande förmåga | | | | |  | | |  | |  | | | |  |  | | |
| Personliga egenskaper:  Stöttande, omsorgsfull, omtänksam  Vänlig, rolig att arbeta med | | | | |  | | |  | |  | | | |  |  | | |
